# Supplementary material for: Seipin negatively regulates sphingolipid production at the ER–LD contact site
Source: PubMed Central journal article supplement — J Cell Biol. 2019 Oct 8;218(11):3663–80. doi: 10.1083/jcb.201902072 (PMC6829658; doi:10.1083/jcb.201902072), 2019-10-08
Supplement: JCB_201902072_sm.pdf [file JCB_201902072_sm.pdf]

## Supplemental material

Su et al., <https://doi.org/10.1083/jcb.201902072>

*Provided online are two tables. Table S1 lists the strains, plasmids, and primers used in this study. Table S2 lists the complete set of data for the Sei1-TAP purification screen.*

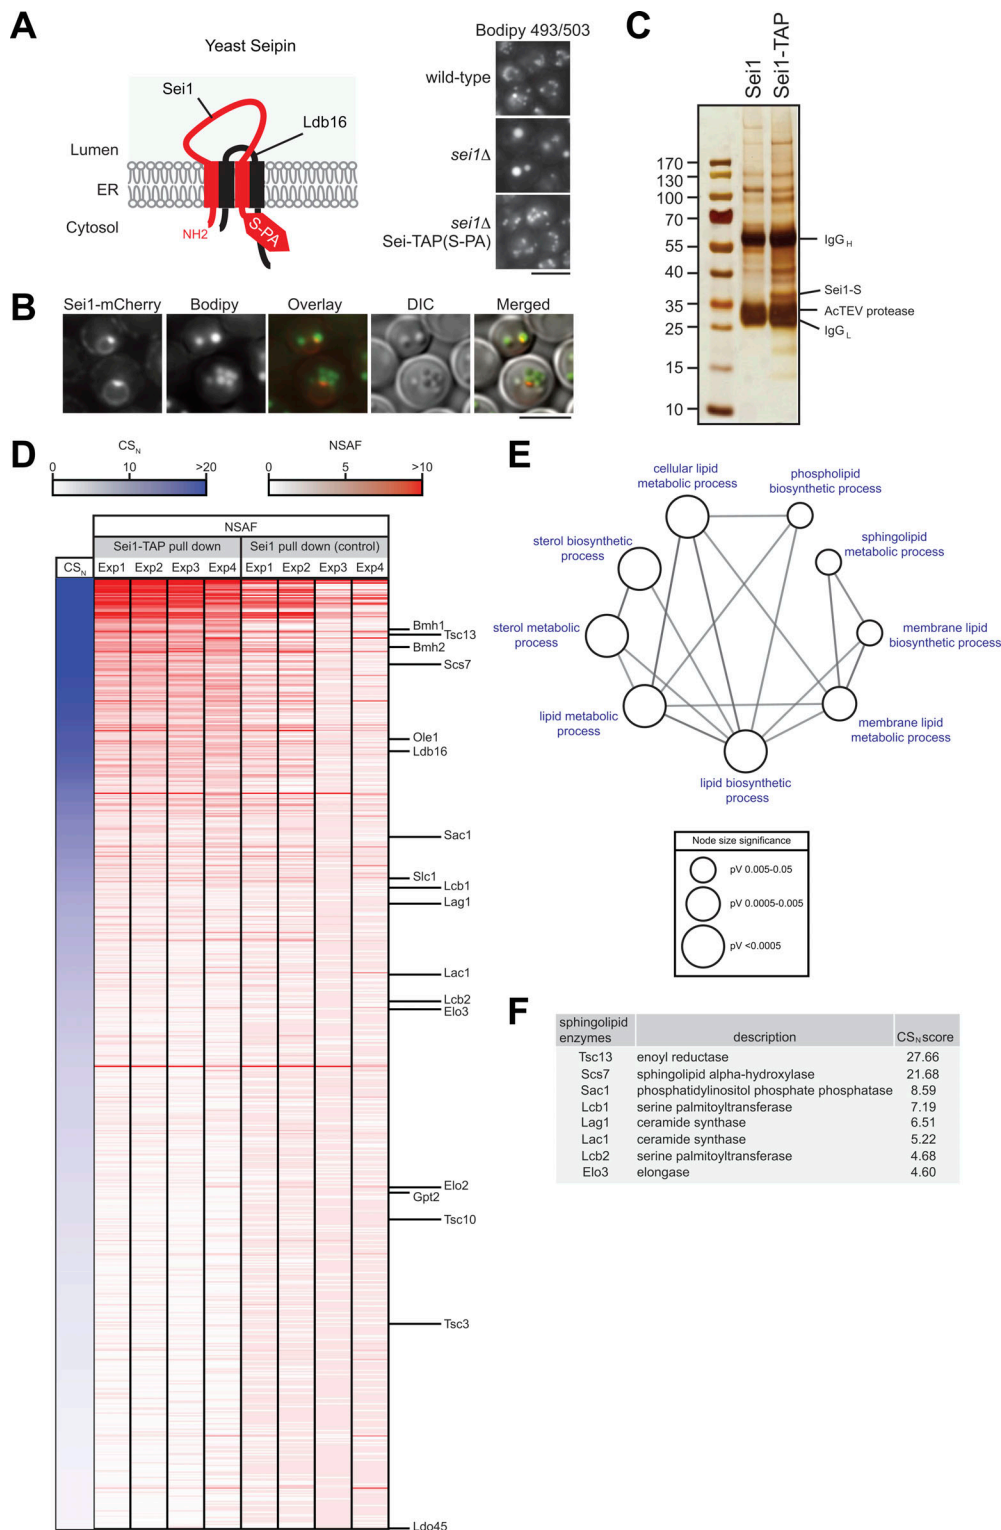

Figure S1. **Putative seipin-interacting proteins revealed by large-scale Sei1-TAP purification.** (A) Left: Schematic representation of Sei1-TAP and Ldb16, together as yeast seipin, in the ER membrane. Right: LDs in wild-type, *sei1Δ*, and the *GPD* promoter-driven Sei1-TAP expression strain were stained by Bodipy 493/503, followed by fluorescence microscopy. Scale bar, 5 μm. (B) Cells harboring Sei1-mCherry driven by the *GPD* promoter were grown in SCD medium and their LDs stained with Bodipy 493/503, followed by fluorescence microscopy. Scale bar, 5 μm. (C) TAP purification from Sei1 and Sei1-TAP strains were resolved by SDS-PAGE, followed by silver staining. (D) Summary of the putative Sei1-interacting proteins with CS<sub>N</sub> ≥ 1 as described in Materials and methods. Selected spingolipid enzymes and proteins previously shown to interact with seipin were labeled. (E) Proteins pulled down with Sei1-TAP showing CS<sub>N</sub> ≥ 1 were analyzed by ClueGO to show GO/pathway terms. Nine high-confidence Sei1-interacting proteins enriched in lipid metabolism pathways are displayed. The lines represent GO-term relationships, and the node size represents the term enrichment significance. (F) List of spingolipid biosynthetic enzymes found in D with CS<sub>N</sub> ≥ 3.

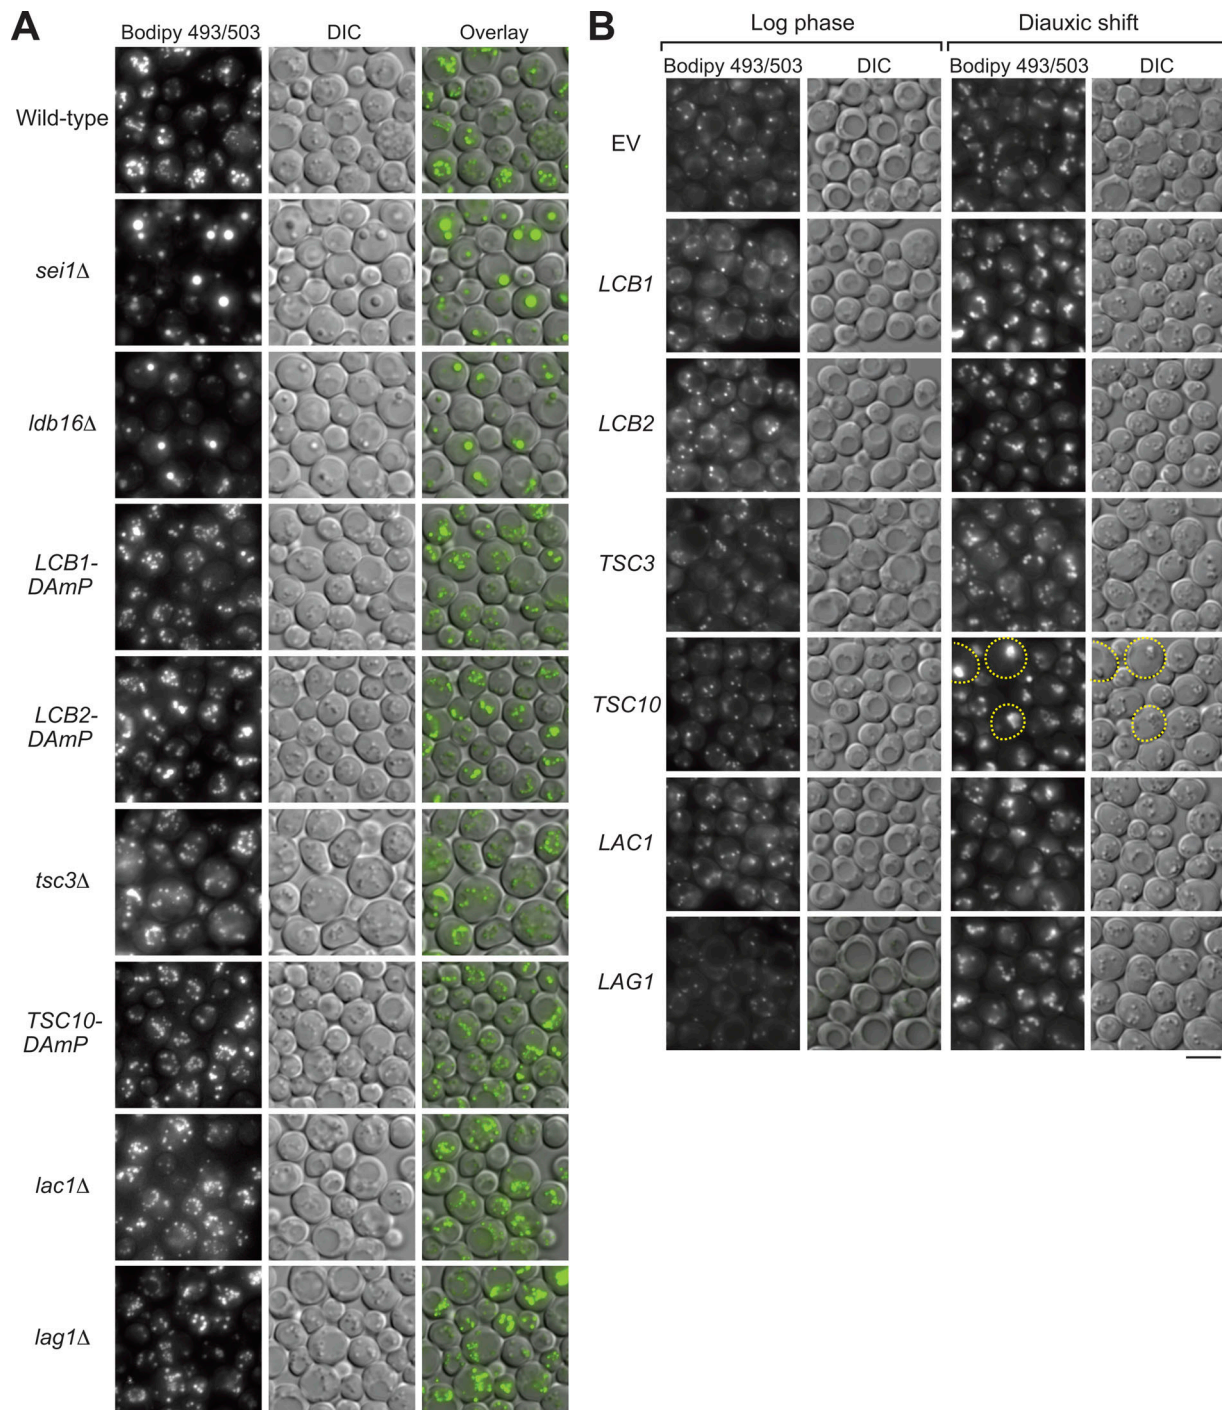

Figure S2. **The LD phenotypes of cells with altered sphingolipid enzymes.** (A) Yeast strains as indicated were grown in SCD medium to the diauxic shift and their LDs stained with Bodipy 493/503, followed by microscopy. Fluorescence images are the maximum-intensity projection of 10 optical sections spaced at 0.5  $\mu\text{m}$ . Scale bar, 5  $\mu\text{m}$ . (B) Wild-type cells transformed with *pRS426* (empty vector [EV]), *pRS426-LCB1*, *pRS426-LCB2*, *pRS426-TSC3*, *pRS426-TSC10*, *pRS426-LAC1*, or *pRS426-LAG1* were grown in SCD medium to log (OD 0.6–0.8) or diauxic shift stage (OD 1.8) and their LDs stained with Bodipy 493/503, followed by fluorescence microscopy. Cells displaying aggregated LDs were circled in yellow. Scale bar, 5  $\mu\text{m}$ .

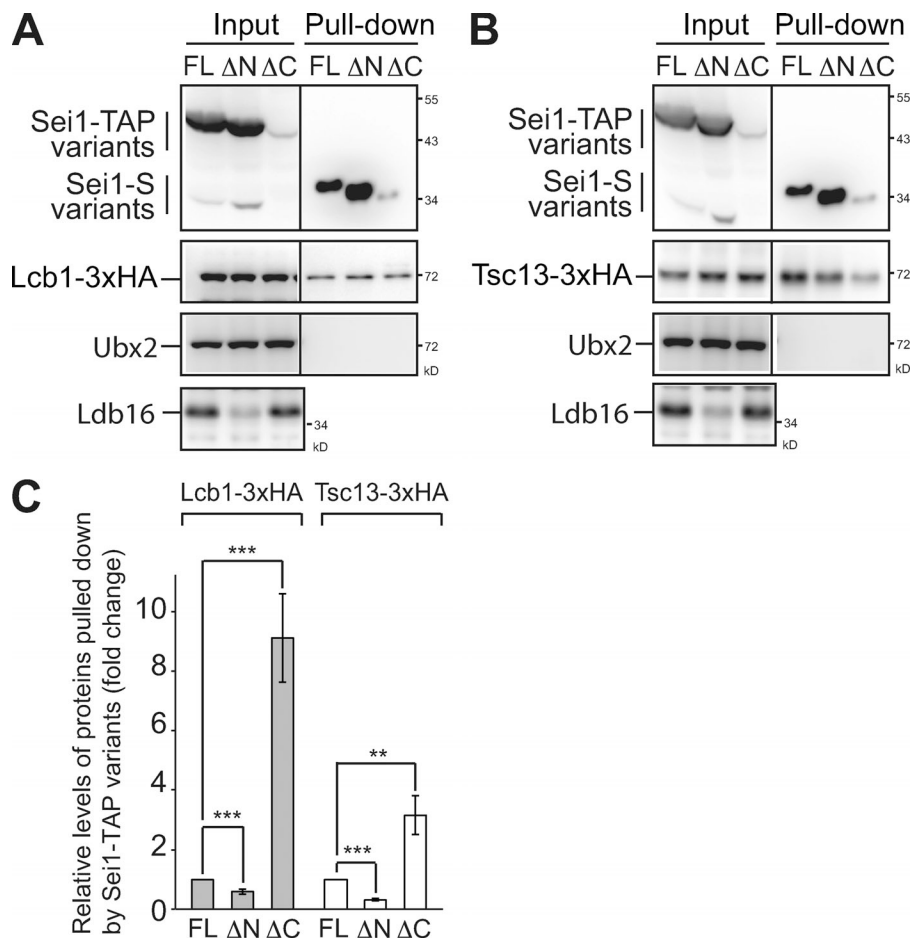

Figure S3. **Lcb1-3xHA and Tsc13-3xHA levels pulled down by Sei1-TAP deleted of N- or C-terminus.** (A) Cells expressing Lcb1-3xHA and full-length (FL), N-terminal deletion ( $\Delta N$ ), or C-terminal deletion ( $\Delta C$ ) of Sei1-TAP were grown in SCD medium to log phase and lysed by spheroplasting. The cleared lysates (input) underwent a pull-down assay with IgG Sepharose, followed by TEV protease cleavage (pull-down). Input and pull-down fractions were examined by Western blot analysis with anti-S, anti-HA, anti-Ubx2, and anti-Ldb16 antibodies. (B) Same as A, except that cells expressed Tsc13-3xHA instead of Lcb1-3xHA. (C) After being normalized to Sei1-S in the pull-down fractions, the levels of Lcb1-3xHA (A) and Tsc13-3xHA (B) in the pull-down fractions were compared with that of full length and plotted as fold change. Data are mean  $\pm$  SD from three independent experiments. \*\*,  $P < 0.01$ ; \*\*\*,  $P < 0.001$ .
